1

2

3

4

The Mimivirus L375 Nudix enzyme hydrolyzes the 5' mRNA cap

5

Short title: Mimivirus L375 mRNA decapping enzyme

6

7

8

Grace Kago<sup>1#a</sup> and Susan Parrish<sup>1\*</sup>

9

10

11

12

13

14

<sup>1</sup>Department of Biology, McDaniel College, Westminster, Maryland, United States of

15

America

16

17

<sup>#a</sup>Current Address: Department of Molecular Biosciences, Institute for Cellular and

18

Molecular Biology, The University of Texas at Austin, Austin, Texas, United States of

19

America

20

21

22

\*Corresponding author

23

E-mail: [sparrish@mcdaniel.edu](mailto:sparrish@mcdaniel.edu) (SP)

## 24 **Abstract**

25           The giant Mimivirus is a member of the nucleocytoplasmic large DNA viruses  
26 (NCLDV), a group of diverse viruses that contain double-stranded DNA (dsDNA)  
27 genomes that replicate primarily in eukaryotic hosts. Two members of the NCLDV,  
28 Vaccinia Virus (VACV) and African Swine Fever Virus (ASFV), both synthesize Nudix  
29 enzymes that have been shown to decap mRNA, a process thought to accelerate viral and  
30 host mRNA turnover and promote the shutoff of host protein synthesis. Mimivirus  
31 encodes two Nudix enzymes in its genome, denoted as L375 and L534. Importantly,  
32 L375 exhibits sequence similarity to ASFV-DP and eukaryotic Dcp2, two Nudix  
33 enzymes shown to possess mRNA decapping activity. In this work, we demonstrate that  
34 recombinant Mimivirus L375 cleaves the 5' m<sup>7</sup>GpppN mRNA cap, releasing m<sup>7</sup>GDP as a  
35 product. L375 did not significantly cleave mRNAs containing an unmethylated 5'GpppN  
36 cap, indicating that this enzyme specifically hydrolyzes methylated-capped transcripts. A  
37 point mutation in the L375 Nudix motif completely eliminated cap hydrolysis, showing  
38 that decapping activity is dependent on this motif. Addition of methylated cap derivatives  
39 or uncapped RNA inhibited L375 decapping activity, suggesting that L375 recognizes its  
40 substrate through interaction with both the mRNA cap and RNA body.

41

## 42 **Introduction**

43           The giant Mimivirus, which infects *Acanthamoeba* species, possesses a 1.2 Mb  
44 genome encoding over 900 proteins [1-3]. Interestingly, Mimivirus rivals some small

45 bacterial species with respect to physical and genome size, and was the first virus  
46 identified to encode some of its own translational components [1-3]. Mimivirus is a  
47 member of the nucleocytoplasmic large DNA viruses (NCLDV), a group that currently  
48 includes seven viral families: *Poxviridae*, *Asfarviridae*, *Iridoviridae*, *Phycodnaviridae*,  
49 *Mimiviridae*, *Ascoviridae*, and *Marseilleviridae* [4-8]. While many members of the  
50 NCLDV share a subset of conserved genes, the evolutionary origins and relationships of  
51 the NCLDV remain controversial [4-7, 9].

52         The Nudix hydrolase motif is a conserved amino acid sequence found in a diverse  
53 group of enzymes that typically cleave *nucleoside diphosphates* linked to another moiety  
54 *X* [10]. Nudix enzymes are nearly universal, found in prokaryotes, eukaryotes, and some  
55 viruses [4, 5, 11, 12]. Two NCLDV families, *Poxviridae* and *Asfarviridae*, encode Nudix  
56 enzymes that possess intrinsic mRNA decapping activity, a process that leads to mRNA  
57 degradation and subsequent inhibition of gene expression [13-15].

58         The prototypic poxvirus, Vaccinia Virus (VACV), encodes two Nudix enzymes in  
59 its genome termed D9 and D10. The D9R (VACV-WR\_114) and D10R (VACV-  
60 WR\_115) genes lie adjacent to each other in the genome and encode proteins that share  
61 ~20% amino acid identity but are expressed at different times during infection [16-18].  
62 Prior genetic studies showed that over-expression of either D9R or D10R resulted in  
63 accelerated turnover of mRNAs containing 5' m<sup>7</sup>GpppN caps, a structural feature of both  
64 VACV and eukaryotic host mRNAs [17]. While deletion of D9R did not cause any  
65 obvious defects, deletion or inactivation of D10R resulted in persistence of viral and host  
66 mRNAs and a delay in the shutoff of host protein synthesis [17-19]. Subsequent  
67 biochemical experiments confirmed that both D9 and D10 cleave the mRNA cap,

68 releasing m<sup>7</sup>GDP as a product [13, 14]. Together, these data suggest that VACV D9 and  
69 D10 decap viral and host mRNAs to facilitate mRNA turnover and the shutoff of host  
70 protein synthesis, thereby promoting viral infection.

71 The sole member of *Asfarviridae*, African Swine Fever Virus (ASFV), contains a  
72 gene (termed g5R in strain Malawi and D250 in strain Ba71V) that encodes the Nudix  
73 enzyme denoted as ASFV-DP [20, 21]. Although ASFV-DP does not share significant  
74 sequence similarity to VACV D9 or D10, it does exhibit sequence similarity to Dcp2, an  
75 mRNA decapping enzyme found in yeasts and mammals, along with other multicellular  
76 eukaryotes [12, 21-26]. ASFV-DP was shown to cleave a broad range of substrates,  
77 including diphosphoinositol polyphosphates, GTP, and the 5' m<sup>7</sup>GpppN cap when  
78 attached to an RNA moiety [15, 20]. Subsequent *in vivo* studies revealed that over-  
79 expression of ASFV-DP increases viral and host mRNA turnover, supporting the idea  
80 that ASFV-DP mediates mRNA decapping and destabilization during infection [21]

81 The Mimivirus genome encodes two putative Nudix enzymes in its genome,  
82 termed L375 (NCBI ID: YP\_003986880) and L534 (NCBI ID: YP\_003987047). Of the  
83 characterized viral Nudix enzymes, L375 is most similar to the ASFV-DP mRNA  
84 decapping enzyme, sharing ~21% amino acid identity. In contrast, L534 does not exhibit  
85 significant similarity to any of the known viral or eukaryotic mRNA decapping enzymes,  
86 instead showing sequence similarity to uncharacterized Nudix enzymes of other giant  
87 viruses, bacteria, and single-celled eukaryotes. Given the sequence similarity between  
88 L375 and ASFV-DP, we chose to focus this work exclusively on Mimivirus L375.

89 To determine if Mimivirus L375 can cleave the mRNA cap, a recombinant  
90 version of this protein was expressed in bacteria and purified by affinity chromatography.

91 Recombinant L375 cleaved the 5' m<sup>7</sup>GpppN mRNA cap, releasing m<sup>7</sup>GDP as a product,  
92 a reaction dependent on an intact Nudix motif. Importantly, L375 did not significantly  
93 cleave unmethylated GpppG capped mRNAs, suggesting that L375 specifically  
94 recognizes the methylated mRNA cap structure. Addition of uncapped RNA to the  
95 reaction significantly inhibited L375 cap cleavage activity. Furthermore, L375 decapping  
96 activity was reduced in the presence of certain methylated cap derivatives, suggesting  
97 that L375 uses both the RNA and cap moieties to locate target substrates.

98

## 99 **Materials and methods**

### 100 **Plasmid design**

101 Mimivirus L375 appended with a C-terminal 10X histidine tag was generated by  
102 GeneArt (Life Technologies) for codon-optimized expression in *Escherichia coli*. The  
103 synthetic L375 gene was then amplified by the polymerase chain reaction (PCR) using  
104 the oligonucleotide primers: 5'-ATG GAA TAT GAA ACC AAC TTT CGC AAA AAA  
105 CAC ATT TG and 5'-GCG CGC AAG CTT TTA GTG ATG ATG GTG GTG ATG  
106 GTG ATG ATG ATG. The resulting PCR product was ligated into the pMal-c2x protein  
107 expression plasmid (New England Biolabs) adjacent to the *malE* gene to generate the  
108 pMAL-c2x-*malE*-L375-his<sub>10</sub> plasmid encoding maltose binding protein (MBP) fusion  
109 protein MBP-L375-HIS<sub>10</sub>. A targeted mutation in the Nudix motif was introduced  
110 through use of the QuikChange site-directed mutagenesis kit (Agilent Technologies) to  
111 produce a plasmid encoding L375 (E258Q).

112

## 113 **Synthesis and purification of recombinant L375 protein**

114 Wild-type or mutated pMAL-c2x-*malE*-L375-his<sub>10</sub> plasmids were transformed  
115 into *Escherichia coli* strain BL21 (EMD Millipore) for subsequent growth in LB broth  
116 supplemented with 50 µg/ml carbenicillin and 0.2% (w/v) glucose. MBP-L375-HIS<sub>10</sub>  
117 expression was induced with 0.15 mM isopropyl β-D-1 thiogalactopyranoside (IPTG)  
118 followed by growth at 28 °C. After 4 h of induction, cell lysates were produced using  
119 sonication. The recombinant protein was sequentially purified using an amylose column  
120 (New England Biolabs) followed by a nickel-nitrilotriacetic acid column (Qiagen) and  
121 then dialyzed against buffer comprised of 10 mM Tris-HCl pH 7.5, 100 mM NaCl, 10%  
122 glycerol, 1 mM DTT, and 2 mM Mg acetate [27]. Recombinant VACV MBP-D10 was  
123 produced and purified by affinity column chromatography as detailed in Parrish et al.  
124 [13].

125

## 126 **Synthesis of RNA substrate**

127 The MEGAscript kit (Life Technologies) and pTRI-β-actin-human template  
128 (Life Technologies) were used to *in vitro* transcribe a 309-nt actin RNA transcript that  
129 was subsequently cap-labeled using recombinant VACV guanylyltransferase/guanine-7-  
130 methyltransferase (Epicentre Biotechnologies) in conjunction with capping buffer (50  
131 mM Tris-HCl pH 8.0, 6 mM KCl, 1.25 mM DTT, 1.25 MgCl<sub>2</sub>), 0.132 µM [α-<sup>32</sup>P] GTP,  
132 and 0.1 mM *S*-adenosylmethionine [28]. The cap-labeled RNA was then purified from  
133 unincorporated nucleotides by using a ProbeQuant G-50 gel filtration column (GE  
134 Healthcare).

135

## 136 **RNA decapping assays**

137           0.02 pmol of cap-labeled RNA was incubated with purified recombinant wild-  
138 type or mutant MBP-L375-HIS<sub>10</sub> in the presence of decapping buffer (100 mM K acetate,  
139 10 mM Tris-HCl pH 7.5, 2 mM MgCl<sub>2</sub>, 0.5 mM MnCl<sub>2</sub>, and 2 mM DTT) in a total  
140 volume of 15 µl for 30 min at 37 °C [27]. 2 µl aliquots of each reaction were resolved on  
141 a polyethyleneimine-cellulose thin layer chromatography plate (Sigma-Aldrich)  
142 developed in 0.75 M LiCl. UV shadowing was used to detect unlabeled nucleotide  
143 standards while autoradiography and PhosphorImager analysis (Molecular Dynamics)  
144 were used to visualize radioactive signals.

145

## 146 **Results**

### 147 **Recombinant Mimivirus L375 exhibits mRNA decapping**

#### 148 **activity**

149           The observation that Mimivirus L375 harbors a Nudix motif, in conjunction with  
150 the sequence similarity observed between L375 and ASFV-DP, suggested that L375  
151 could possess intrinsic mRNA decapping activity to modulate mRNA turnover during  
152 infection. To evaluate if recombinant Mimivirus L375 could decap mRNA, a maltose  
153 binding protein (MBP)-L375 fusion protein terminated with C-terminal 10X histidine  
154 epitope tag (MBP-L375-HIS<sub>10</sub>) was synthesized in *Escherichia coli* and purified through  
155 successive amylose and nickel-nitrilotriacetic acid columns. Following separation of the  
156 purified recombinant protein through sodium dodecyl sulfate-polyacrylamide gel

157 electrophoresis (SDS/PAGE), the expected ~87-kDa band for MBP-L375-HIS<sub>10</sub> was  
158 observed (Fig 1A).

159

160 **Fig 1. Recombinant Mimivirus L375 hydrolyzes the mRNA cap.** (A) An MBP-L375  
161 fusion protein containing a C-terminal 10X histidine epitope tag (MBP-L375-HIS<sub>10</sub>) was  
162 synthesized in *Escherichia coli* and purified by affinity chromatography through  
163 successive amylose and nickel-nitrilotriacetic acid columns. The purified MBP-L375-  
164 HIS<sub>10</sub> protein was separated by SDS/PAGE and visualized by Coomassie blue staining.  
165 The locations of the protein mass standards (in kDa) are labeled on the left side of the gel  
166 and the ~87 kDa MBP-L375-HIS<sub>10</sub> protein is denoted on the right. (B) MBP-L375-HIS<sub>10</sub>  
167 (80 ng) and 0.02 pmol <sup>32</sup>P-cap-labeled actin RNA were added to decapping buffer and  
168 incubated at 37 °C for 30 min. After the incubation, an aliquot of the reaction was treated  
169 with 2 U of nucleoside diphosphate kinase (NDPK) in the presence of 1 mM ATP at 37  
170 °C for 30 min to convert nucleoside diphosphates into nucleoside triphosphates. The  
171 products of the reaction were separated on PEI-cellulose TLC plates in 0.75 M LiCl and  
172 the radioactive signals were visualized by autoradiography. Non-radioactive nucleotide  
173 standards were run in parallel and detected by UV shadowing, as indicated on the right.

174

175 For the mRNA decapping assays, *in vitro* synthesized 309-nt actin RNA was  
176 capped, methylated, and radioactively labeled using recombinant VACV RNA  
177 guanylyltransferase/guanine-7-methyltransferase in the presence of [ $\alpha$ <sup>32</sup>P] GTP and S-  
178 adenosylmethionine [28]. The <sup>32</sup>P-cap-labeled RNA substrate was then combined with  
179 MBP-L375-HIS<sub>10</sub> and the products of the reactions were separated on polyethyleneimine



180 (PEI)-cellulose thin layer chromatography (TLC) plates. Radioactive signals were  
181 visualized using either autoradiography or PhosphorImager analysis, whereas unlabeled  
182 TLC nucleotide standards were detected by UV shadowing.

183 As expected, in the absence of recombinant L375, the large  $^{32}\text{P}$ -cap-labeled RNA  
184 stayed at the origin of the TLC plate and no major reaction products were detected; the  
185 minor faint spot detected may correspond to unincorporated GTP remaining after  
186 purification of the cap-labeled RNA (Fig 1B). When recombinant MBP-L375-HIS<sub>10</sub> was  
187 included in the reaction, a product was released that migrated the same distance as the  
188 unlabeled m<sup>7</sup>GDP standard, demonstrating that L375 cleaves the methylated mRNA cap  
189 (Fig 1B). After cap hydrolysis, a residual amount of uncleaved cap-labeled RNA was  
190 observed at the origin. Since L375 specifically cleaves methylated-capped structures (see  
191 below) and methylation by *S*-adenosylmethionine of the cap-labeled RNA is generally  
192 incomplete, some intact, unmethylated cap-labeled RNA is expected to remain at the  
193 origin.

194 To confirm that the product released was m<sup>7</sup>GDP, the decapping products were  
195 incubated with nucleoside diphosphate kinase (NDPK), an enzyme that phosphorylates  
196 nucleoside diphosphates to yield nucleoside triphosphates. After the addition of NDPK,  
197 the m<sup>7</sup>GDP product generated by MBP-L375-HIS<sub>10</sub> shifted in a downward direction to  
198 co-migrate with the m<sup>7</sup>GTP standard (Fig 1B).

199

200 **Recombinant Mimivirus L375 mRNA decapping activity is**  
201 **dependent on the Nudix motif**

202           The highly conserved Nudix box consists of the signature sequence  
203   GX<sub>5</sub>EX<sub>5</sub>[UA]XREX<sub>2</sub>EEXGU (where U indicates either isoleucine, leucine, or valine and  
204   X denotes any amino acid), of which the EX<sub>2</sub>EE sequence has been shown to be required  
205   for divalent cation binding and catalytic activity [10, 29, 30]. To determine whether the  
206   Nudix motif was essential for cap cleavage, a point mutation was created in the essential  
207   EX<sub>2</sub>EE active site residues of L375. A mutated version of L375 was synthesized in which  
208   the glutamic acid at position 258 was changed to glutamine [L375(E258Q)]. The mutated  
209   L375(E258Q) protein was expressed in *Escherichia coli* and then purified by affinity  
210   chromatography concurrently with the wild-type recombinant proteins. As previously  
211   shown, incubation of wild-type recombinant L375 with the capped mRNA substrate  
212   resulted in the hydrolysis of the 5' cap and release of m<sup>7</sup>GDP (Fig 2). However, when an  
213   equal amount of the mutant L375(E258Q) protein was added to the capped RNA  
214   substrate, m<sup>7</sup>GDP was not liberated, confirming that the Nudix motif was essential for  
215   cap cleavage and that the recombinant protein was directly responsible for the decapping  
216   activity observed in the assay (Fig 2).

217

218   **Fig 2. The mRNA decapping activity of recombinant L375 is dependent on an intact**  
219   **Nudix hydrolase motif.** The Nudix motif of MBP-L375-HIS<sub>10</sub> was subjected to site-  
220   directed mutagenesis to convert the glutamic acid residue at position 258 into a glutamine  
221   residue, thereby producing L375(E258Q). The mutant and wild-type proteins were  
222   expressed and purified in parallel as described in Fig 1A and equivalent amounts of the  
223   two proteins (50 ng) were added to separate mRNA decapping assays conducted as in Fig  
224   1B.

225

## 226 **Recombinant Mimivirus L375 specifically cleaves methylated** 227 **cap structures**

228           Since Nudix enzymes can cleave a broad range of substrates, it was important to  
229 investigate the specificity of L375 for the 5' m<sup>7</sup>GpppN mRNA cap [31]. The mRNA cap  
230 contains a unique methyl group at position 7 on the guanine base, a structural feature  
231 often recognized by proteins that exclusively bind and/or cleave the mRNA cap. To  
232 examine the selectivity of L375 for the 5' m<sup>7</sup>GpppN cap structure, an unmethylated  
233 GpppN-capped RNA was synthesized by excluding the *S*-adenosylmethionine methyl  
234 donor from the capping reaction, and the unmethylated substrate was subsequently  
235 incubated with recombinant L375. Importantly, recombinant L375 was not able to  
236 significantly cleave the unmethylated GpppN cap to release GDP, indicating that this  
237 enzyme specifically recognizes the methylated mRNA cap (Fig 3). As expected, when  
238 equivalent amounts of mutant L375(E258Q) protein was added to the unmethylated cap-  
239 labeled substrate, no products were generated.

240

241 **Fig 3. Recombinant L375 specifically cleaves methylated cap structures.** (A) The  
242 <sup>32</sup>P-cap-labeled actin 309-nt RNA substrate was synthesized either in the presence  
243 (+CH<sub>3</sub>) or absence (-CH<sub>3</sub>) of the methyl donor *S*-adenosylmethionine. 0.02 pmol of  
244 methylated or unmethylated RNA substrate was incubated with either 50 ng of  
245 recombinant wild-type L375 or mutant L375 (E258Q) in mRNA decapping assays as  
246 described in Fig 1B.

247

248 **Mimivirus L375 mRNA decapping activity increases with time**  
249 **and enzyme concentration**

250 A time course experiment revealed that the amount of m<sup>7</sup>GDP product released by  
251 L375 increased through time, as expected for an enzyme (Fig 4A). Likewise, increasing  
252 amounts of L375 enzyme resulted in the release of more m<sup>7</sup>GDP product, until saturation  
253 was reached (Fig 4B). As noted for above and similar to other viral mRNA decapping  
254 enzymes, a proportion of the substrate remains resistant to cleavage despite high enzyme  
255 concentrations (~28%), because some of the <sup>32</sup>P-cap-labeled RNA remains unmethylated  
256 and therefore not a viable substrate. This observation, along with the finding that the  
257 presence of uncapped RNA inhibits L375 mRNA decapping activity (see Fig 5 below),  
258 hindered our ability to determine the kinetic coefficients of the reaction.

259

260 **Fig 4. Recombinant L375 mRNA decapping activity increases with time and**  
261 **enzyme concentration.** (A) 60 ng of recombinant L375 was incubated with 0.02 pmol  
262 <sup>32</sup>P-cap-labeled actin RNA substrate in decapping buffer at 37 °C for the time indicated  
263 on the graph. After separation of the reaction products on PEI-cellulose TLC plates, the  
264 percentage of m<sup>7</sup>GDP released was calculated by PhosphorImager analysis. (B) The  
265 indicated amount of recombinant L375 was added to 0.02 pmol <sup>32</sup>P-cap-labeled actin  
266 RNA substrate for mRNA decapping assays performed as in Fig 1B. The percentage of  
267 m<sup>7</sup>GDP liberated was quantified using a PhosporImager.

268

269 **Uncapped RNA inhibits Mimivirus L375 mRNA decapping**  
270 **activity**

271 The viral mRNA decapping enzymes characterized to date have all been shown to  
272 be inhibited by the addition of uncapped RNA, suggesting that these enzymes recognize  
273 and bind the RNA moiety during substrate identification [13-15]. To evaluate if  
274 Mimivirus L375 also interacts with the RNA body during substrate recognition,  
275 increasing molar amounts of uncapped RNA were added to the reaction and the  
276 percentage of m<sup>7</sup>GDP product released was calculated. Addition of uncapped RNA  
277 competitor significantly decreased L375 decapping activity, in a manner almost identical  
278 to that observed for VACV D10 (Fig 5). For example, a 20-fold molar excess of  
279 competitor RNA reduced both L375 and VACV decapping activity by 62%, suggesting  
280 that L375 binds the RNA body during substrate recognition (Fig 5).

281

282 **Fig 5. Recombinant L375 mRNA decapping activity is reduced by the addition of**  
283 **uncapped RNA competitor.** 80 ng of recombinant L375 or VACV D10 and 0.02 pmol  
284 <sup>32</sup>P-cap-labeled 309-nt actin RNA were incubated with increasing amounts of uncapped,  
285 non-radioactive 309-nt actin RNA in mRNA decapping assays conducted as described in  
286 Fig 1B. The percentage of m<sup>7</sup>GDP product released was determined by using a  
287 PhosphorImager.

288

289 **Methylated nucleotides inhibit L375 mRNA decapping activity**

290 It was previously shown that the decapping activity of VACV D9 and D10 was  
291 inhibited by m<sup>7</sup>GTP, m<sup>7</sup>GDP, and m<sup>7</sup>GpppG, structures that mimic the mRNA cap and  
292 therefore may compete for binding [13, 14]. Conversely, ASFV-DP was not inhibited by  
293 any of the three methylated cap analogs, indicating that ASFV-DP may exclusively use  
294 the RNA moiety to locate its substrate [15]. To evaluate the effect of methylated  
295 nucleotides on L375 substrate cleavage, increasing quantities of m<sup>7</sup>GTP, m<sup>7</sup>GDP, and  
296 m<sup>7</sup>GpppG or unmethylated alternatives of these nucleotides were included in the  
297 reactions and the amount of product generated was calculated. Interestingly, the most  
298 robust inhibition of L375 decapping activity was observed for m<sup>7</sup>GTP, mirroring the  
299 results seen for VACV D10 (Figs 6A, 6B, and 6C). m<sup>7</sup>GDP also inhibited L375 cap  
300 cleavage, but the effect was more modest than that observed for m<sup>7</sup>GTP (Fig 6B).  
301 Surprisingly, m<sup>7</sup>GpppG did not significantly reduce the ability of L375 to decap mRNA,  
302 in contrast to the observed reduction of D10 decapping activity by this cap analog (Fig  
303 6C). In support of the specificity of L375 for the methylated cap, the unmethylated  
304 versions of the three nucleotides (GDP, GTP, and GpppG) did not significantly inhibit  
305 L375 decapping activity. These results suggest that L375 may recognize both the  
306 methylated cap structure and the RNA moiety during substrate identification.

307

308 **Fig 6. Recombinant L375 mRNA decapping activity is inhibited by addition of**  
309 **m<sup>7</sup>GTP or m<sup>7</sup>GDP.** (A) 80 ng of recombinant L375 or VACV D10 and 0.02 pmol <sup>32</sup>P-  
310 cap-labeled actin RNA were incubated together in the presence of increasing quantities of  
311 m<sup>7</sup>GTP or GTP in mRNA decapping assays as described in Fig 1B. The percentage of  
312 m<sup>7</sup>GDP liberated was calculated through PhosphorImager analysis. (B) mRNA decapping

313 assays were performed as in Panel A with increasing amounts of m<sup>7</sup>GDP or GDP. (C)  
314 mRNA decapping assays were performed as described in Panel A with increasing  
315 amounts of m<sup>7</sup>GpppG cap analog or GpppG.

316

## 317 **Discussion**

318 Nudix hydrolases cleave a broad range of substrates, a subset of which cleave the  
319 5' mRNA cap. The importance of these enzymes is illustrated by their conservation  
320 between the living organisms (prokaryotes and eukaryotes), as well as their presence in  
321 some of the non-living viruses. Three NCLDV Nudix hydrolases have been characterized  
322 to date, VACV D9, VACV D10, and ASFV-DP. Each of these enzymes have been shown  
323 to possess intrinsic mRNA decapping activity *in vitro* [13-15]. Importantly, ASFV-DP  
324 shares sequence similarity to both the well-characterized eukaryotic Dcp2 Nudix mRNA  
325 decapping enzyme and Mimivirus L375, the focus of this work [12, 21-26].

326 Here we show that the Mimivirus Nudix enzyme L375 hydrolyzed the mRNA cap  
327 to release m<sup>7</sup>GDP; a reaction that is dependent on an intact Nudix box. Like L375,  
328 VACV D9 was shown to preferentially hydrolyze methylated rather than unmethylated  
329 mRNA caps [14]. In contrast, ASFV-DP has a broader nucleotide substrate range that  
330 includes GTP [15, 20]. Eukaryotic Dcp2 has been reported to preferentially cleave  
331 methylated rather than unmethylated cap structures, although some decapping activity  
332 has been detected with unmethylated mRNA cap substrates depending on the divalent  
333 cation present in the reaction buffer [23-25, 27, 32].

334           Similar to the viral and eukaryotic mRNA decapping enzymes characterized to  
335   date, uncapped competitor RNA reduced L375 decapping activity, suggesting that L375  
336   also uses the RNA moiety for substrate selection [13-15, 25, 27, 33]. Previous studies  
337   showed that uncapped competitor RNA more potently inhibited the mRNA decapping  
338   activity of ASFV-DP compared to VACV D9 or D10 (ASFV-DP>D9>D10), indicating  
339   that ASFV-DP may have a higher affinity for RNA than the poxvirus enzymes [13-15].  
340   In this work, the inhibition of L375 by competitor RNA more closely resembled that of  
341   VACV D10, suggesting that L375 may have a lower affinity for RNA than ASFV-DP,  
342   despite their greater sequence similarity.

343           The strong affinity of ASFV-DP for RNA was confirmed through an  
344   electrophoretic mobility shift assay, in which the migration of uncapped RNA was  
345   impeded with the addition of ASFV-DP [15]. Subsequent *in vivo* experiments confirmed  
346   that ASFV interacts with viral and host mRNAs during infection, a property dependent  
347   on the N-terminus of the protein, rather than the Nudix motif [21]. ASFV-DP also  
348   exhibited different levels of binding efficiency depending on the specific mRNA, similar  
349   to Dcp2 [21]. For example, yeast Dcp2 preferentially binds capped mRNAs with a stem-  
350   loop structure within the first 10 bases of the sequence. [34, 35].

351           As observed for VACV D9 and D10 (but not for ASFV-DP), addition of  
352   methylated cap derivatives reduced L375 decapping activity, suggesting that L375  
353   recognizes the cap structure in addition to the RNA body [13, 14]. Specifically, L375  
354   decapping activity was most potently inhibited by m<sup>7</sup>GTP, followed by m<sup>7</sup>GDP, whereas  
355   the effect of m<sup>7</sup>GpppG was negligible (m<sup>7</sup>GTP>m<sup>7</sup>GDP>m<sup>7</sup>GpppG). In comparison, the  
356   decapping activity of both VACV D9 and D10 was diminished by all three methylated



357 cap derivatives, with the most striking reduction also observed with m<sup>7</sup>GTP [13, 14].  
358 Interestingly, VACV D10 was more sensitive to inhibition by methylated nucleotides  
359 than either L375 or VACV D9, suggesting a greater importance of the cap structure for  
360 substrate recognition for this enzyme [13, 14].

361 In contrast, ASFV-DP was not inhibited by addition of methylated cap  
362 derivatives, nor could it cleave free methylated cap analog *in vitro*, suggesting that for  
363 ASFV-DP, the RNA body is critical during substrate identification [15, 20]. Like ASFV-  
364 DP, the mRNA decapping activity of most eukaryotic Dcp2 enzymes is not affected by  
365 the addition of methylated cap analogs, suggesting these enzymes primarily recognize the  
366 RNA moiety to locate target substrates [23-25, 27]. Hence, the inhibition of L375  
367 decapping activity by methylated cap derivatives more closely resembles VACV D9 and  
368 D10 rather than that of ASFV-DP or Dcp2.

369 The purpose of mRNA decapping during viral infection has been revealed  
370 through *in vivo* studies characterizing VACV D9, D10, and ASFV-DP. Increased  
371 expression of VACV D9, VACV D10, or ASFV-DP resulted in enhanced mRNA  
372 turnover of capped viral and host transcripts, further validating that these enzymes decap  
373 mRNA to elicit subsequent mRNA degradation [17, 21]. Interestingly, over-expression of  
374 ASFV-DP increased degradation of some mRNA transcripts more than others, suggesting  
375 that the degree of mRNA turnover induced by ASFV-DP could be selective, as has been  
376 shown for Dcp2 [21, 34, 35].

377 In complementary genetic studies in VACV, deletion or inactivation of D10  
378 resulted in persistence of viral and host mRNAs, a delay in the shutoff of host protein  
379 synthesis, and a modest reduction of virulence in animal hosts, whereas deletion of D9

380 did not produce any noticeable defects [17-19, 36]. When both D9 and D10 were  
381 inactivated concurrently, viral replication was severely impaired both *in vitro* and *in vivo*,  
382 suggesting that these two enzymes work together synergistically [37]. The substantial  
383 replication defects exhibited by the double D9/D10 mutant virus were shown to result  
384 from the accumulation of excess amounts of viral double-stranded RNA (dsRNA) that  
385 subsequently activated the host's innate immune defenses to curtail infection [37]. These  
386 results suggest that in addition to modulating viral and cellular mRNA turnover, D9 and  
387 D10 also induce viral dsRNA degradation to avoid activating host anti-viral responses.  
388 Furthermore, cellular RNA exonuclease Xrn1, which degrades RNA following  
389 decapping, was also required to avoid aberrant viral dsRNA accumulation, suggesting the  
390 viral mRNA decapping enzymes work in concert with cellular Xrn1 to degrade viral  
391 dsRNA to evade the host immune system [38].

392         Like VACV and ASFV, Mimivirus encodes its own mRNA capping enzyme and  
393 directs a sequential cascade of viral gene expression consisting of early, intermediate, and  
394 late phases; therefore, decapping of viral mRNAs by L375 could provide a mechanism to  
395 orchestrate the transitions between viral gene expression during infection [2, 39].  
396 Furthermore, mRNA decapping by L375 during Mimivirus infection could be responsible  
397 for the degradation of host mRNAs to elicit the shutdown of host protein synthesis,  
398 allowing viral transcripts preferential access to the host translation machinery [2].

399         In contrast to the animal hosts of VACV and ASFV, Mimivirus primarily infects  
400 unicellular *Acanthamoeba* species, and therefore does not require L375 mRNA  
401 decapping activity to evade the complex vertebrate immune systems. However,  
402 Mimivirus could still use selective mRNA decapping and degradation of specific host

403 mRNAs to promote a robust *Acanthamoeba* infection. Future *in vivo* studies will help  
404 elucidate the role of L375 mRNA decapping and decay during Mimivirus infection.

405

## 406 **Acknowledgments**

407 We sincerely thank Bernard Moss for his generous support of this work, guidance,  
408 and helpful suggestions. In addition, we are grateful to Wolfgang Resch, P.S.

409 Satheshkumar, Zhilong Yang, and Cheng Huang for helpful discussions and technical  
410 assistance.

411

## 412 **References**

413 1. Raoult D, Audic S, Robert C, Abergel C, Renesto P, Ogata H, et al. The 1.2-megabase  
414 genome sequence of Mimivirus. *Science*. 2004; 304(5700):1344-1350.

415 2. Legendre M, Audic S, Poirot O, Hingamp P, Seltzer V, Byrne D, et al. mRNA deep  
416 sequencing reveals 75 new genes and a complex transcriptional landscape in Mimivirus.  
417 *Genome Res*. 2010; 20(5):664-674.

418 3. Legendre M, Santini S, Rico A, Claverie J. Breaking the 1000-gene barrier for Mimivirus  
419 using ultra-deep genomic and transcriptome sequencing. *Virology*. 2011 March 4. doi:  
420 [10.1186/1743-422X-8-99](https://doi.org/10.1186/1743-422X-8-99).

421 4. Iyer LM, Aravind L, Koonin EV. Common origin of four diverse families of large eukaryotic  
422 DNA viruses. *J. Virol*. 2001; 75(23):11720-11734.

423 5. Iyer LM, Balaji S, Koonin EV, Aravind L. Evolutionary genomics of nucleo-cytoplasmic  
424 large DNA viruses. *Virus Res*. 2006; 117(1):156-184.

- 425 6. Yutin N, Wolf YI, Raoult D, Koonin EV. Eukaryotic large nucleo-cytoplasmic DNA  
426 viruses: Clusters of orthologous genes and reconstruction of viral genome evolution.  
427 *Virol. J.* 2009; 6(223). doi: [10.1186/1743-422X-6-223](https://doi.org/10.1186/1743-422X-6-223).
- 428 7. Yutin N, Koonin EV. Hidden evolutionary complexity of nucleo-cytoplasmic large  
429 DNA viruses of eukaryotes. *Virol. J.* 2012; 9(161) doi: [https://doi.org/10.1186/1743-](https://doi.org/10.1186/1743-422X-9-161)  
430 [422X-9-161](https://doi.org/10.1186/1743-422X-9-161).
- 431 8. Colson P, Pagnier I, Yoosuf N, Fournous G, La Scola B, Raoult D. “Marseilleviridae”, a new  
432 family of giant viruses infecting amoebae. *Arch. Virol.* 2013; 158(4):915-920.
- 433 9. Koonin EV, Yutin N. Multiple evolutionary origins of giant viruses. *F1000Res.* 2018  
434 Nov. 22. doi: [10.12688/f1000research.16248.1](https://doi.org/10.12688/f1000research.16248.1)
- 435 10. Bessman MJ, Frick DN, O'Handley SF. The MutT proteins or "Nudix" hydrolases, a family  
436 of versatile, widely distributed, "housecleaning" enzymes. *J. Biol. Chem.* 1996;  
437 271(41):25059-25062.
- 438 11. McLennan AG. The Nudix hydrolase superfamily. *Cell Mol. Life Sci.* 2006; 63:123-143.
- 439 12. McLennan, AG. Decapitation: Poxvirus makes RNA lose its head. *Trends Biochem. Sci.*  
440 2007; 32(7):297-299.
- 441 13. Parrish S, Resch W, Moss B. Vaccinia virus D10 protein has mRNA decapping activity,  
442 providing a mechanism for control of host and viral gene expression. *Proc. Natl. Acad. Sci.*  
443 *U. S. A.* 2007; 104(7):2139-2144.
- 444 14. Parrish S, Moss B. Characterization of a second vaccinia virus mRNA-decapping enzyme  
445 conserved in poxviruses. *J. Virol.* 2007; 81(23):12973-12978.
- 446 15. Parrish S, Hurchalla M, Liu SW, Moss B. The African swine fever virus g5R protein  
447 possesses mRNA decapping activity. *Virology.* 2009; 393(1):177-182.

- 448 16. Lee-Chen GJ, Niles EG. Transcription and translation mapping of the 13 genes in the  
449 vaccinia virus HindIII D fragment. *Virology*. 1988; 163(1):52-63.
- 450 17. Shors T, Keck JG, Moss B. Down regulation of gene expression by the vaccinia virus D10  
451 protein. *J. Virol.* 1999; 73(1):791-796.
- 452 18. Parrish S, Moss B. Characterization of a vaccinia virus mutant with a deletion of the D10R  
453 gene encoding a putative negative regulator of gene expression. *J. Virol.* 2006; 80(2):553-  
454 561.
- 455 19. Dvoracek B, Shors T. Construction of a novel set of transfer vectors to study vaccinia virus  
456 replication and foreign gene foreign gene expression. *Plasmid*. 2003; 49(1):9-17.
- 457 20. Cartwright JL, Safrany ST, Dixon LK, Darzynkiewicz E, Stepinski J, Burke R, McLennan,  
458 AG. The g5R (D250) gene of African swine fever virus encodes a Nudix hydrolase that  
459 preferentially degrades diphosphoinositol polyphosphates. *J. Virol.* 2002; 76(3):1415-1421.
- 460 21. Quintas A, Pérez-Núñez D, Sánchez E, Nogal M, Hentze M, Castelló A, Revilla Y.  
461 Characterization of the African Swine Fever Virus decapping enzyme during  
462 infection. *J. Virol.* 2017; 91(24):e00990-17. doi: 10.1128/JVI.00990-17.
- 463 22. Dunckley T, Parker R, The DCP2 protein is required for mRNA decapping in  
464 *Saccharomyces cerevisiae* and contains a functional MutT motif. *EMBO J.* 1999; 18(19),  
465 5411-5422.
- 466 23. Wang Z, Jiao X, Carr-Schmid A, Kiledjian M. The hDcp2 protein is a mammalian mRNA  
467 decapping enzyme. *Proc. Natl. Acad. Sci. U. S. A.* 2002; 99(20):12663-12668.
- 468 24. van Dijk E, Cougot N, Meyer S, Babajko S, Wahle E, Seraphin B. Human Dcp2: a  
469 catalytically active mRNA decapping enzyme located in specific cytoplasmic structures.  
470 *EMBO J.* 2002; 21(24):6915-6924.

- 471 25. Cohen LS, Mikhli C, Jiao X, Kiledjian M, Kunkel G, Davis RE. Dcp2 decaps  
472 m<sup>2,2,7</sup>GpppN-capped RNAs, and its activity is sequence and context dependent. *Mol. Cell*  
473 *Biol.* 2005; 25(20): 8779-8791.
- 474 26. Xu J, Yang JY, Niu QW, Chua NH. *Arabidopsis* DCP2, DCP1, and VARICOSE form a  
475 decapping complex required for postembryonic development. *Plant Cell.* 2006;  
476 18(12):3386-3398.
- 477 27. Piccirillo C, Khanna R, Kiledjian M. Functional characterization of the mammalian mRNA  
478 decapping enzyme hDcp2. *RNA.* 2003; 9(90):1138-1147.
- 479 28. Martin SA, Moss B. Modification of RNA by mRNA guanylyltransferase and mRNA  
480 (guanine-7-)methyltransferase from vaccinia virions. *J. Biol. Chem.* 1975; 250(24):9330-  
481 9335.
- 482 29. Koonin E. A highly conserved sequence motif defining the family of MutT-related proteins  
483 from eubacteria, eukaryotes and viruses. *Nucleic Acids Res.* 1993; 21(20):4847.
- 484 30. Mildvan AS, Xia Z, Azurmendi HF, Saraswat V, Legler PM, Massiah MA et al. Structures  
485 and mechanisms of Nudix hydrolases. *Arch. Biochem. Biophys.* 2005; 433(1):129-143.
- 486 31. McLennan AG. Substrate ambiguity among the nudix hydrolases: biologically significant,  
487 evolutionary remnant, or both? *Cell Mol. Life Sci.* 2013; 70(3):373-385.
- 488 32. Song M, Bail S, Kiledjian M. Multiple Nudix family proteins possess mRNA decapping  
489 activity. *RNA.* 2013; 19(3):390-399.
- 490 33. Gunawardana D, Cheng HC, Gayler KR. Identification of functional domains in *Arabidopsis*  
491 *thaliana* mRNA decapping enzyme (AtDcp2). *Nucleic Acids Res.* 2008; 36(1):203-216.
- 492 34. Li Y, Song M, Kiledjian M. Transcript-specific decapping and regulated stability by the  
493 human Dcp2 decapping protein. *Mol. Cell Biol.* 2008; 28(3):939-948.

- 494 35. Li Y, Ho E, Gunderson S, Kiledjian M. Mutational analysis of a Dcp2-binding element  
495 reveals general enhancement of decapping by 5-end stem-loop structures. *Nucleic Acid Res.*  
496 2009; 37(7):2227-2237.
- 497 36. Liu SW, Wyatt LS, Orandle MS, Minai M, Moss B. The D10 decapping enzyme of vaccinia  
498 virus contributes to decay of cellular and viral mRNAs and to virulence in mice. *J. Virol.*  
499 2014; 88(1):202-211.
- 500 37. Liu SW, Katsafanas GC, Liu R, Wyatt LS, Moss B, Poxvirus decapping enzymes enhance  
501 virulence by preventing the accumulation of dsRNA and the induction of innate antiviral  
502 response. *Cell Host Microbe.* 2015; 17(3):320-331.
- 503 38. Burgess H, Mohr I. Cellular 5'-3' mRNA exonuclease Xrn1 controls double-stranded RNA  
504 accumulation and anti-viral responses. *Cell Host Microbe.* 2015; 17(3): 332-344.
- 505 39. Benarroch D, Smith P, Shuman S. Characterization of a trifunctional Mimivirus mRNA  
506 capping enzyme and crystal structure of the RNA triphosphate domain. *Structure.* 2008;  
507 16(4):501-512.





**-m<sup>7</sup>GDP**

bioRxiv preprint doi: <https://doi.org/10.1101/2021.01.11.426193>; this version posted January 11, 2021. The copyright holder for this preprint (which was not certified by peer review) is the author/funder, who has granted bioRxiv a license to display the preprint in perpetuity. It is made available under aCC-BY 4.0 International license.

**-origin**

**-L375**

**+L375**

**+L375  
E258Q**

Figure

**-m<sup>7</sup>GDP**

bioRxiv preprint doi: <https://doi.org/10.1101/2021.01.11.426193>; this version posted January 11, 2021. The copyright holder for this preprint (which was not certified by peer review) is the author/funder, who has granted bioRxiv a license to display the preprint in perpetuity. It is made available under aCC-BY 4.0 International license.

**-GDP**

**-origin**

**+CH<sub>3</sub>  
-L375**

**+CH<sub>3</sub>  
+L375**

**-CH<sub>3</sub>  
-L375**

**-CH<sub>3</sub>  
+L375**

**-CH<sub>3</sub>  
+L375  
E258Q**

Figure

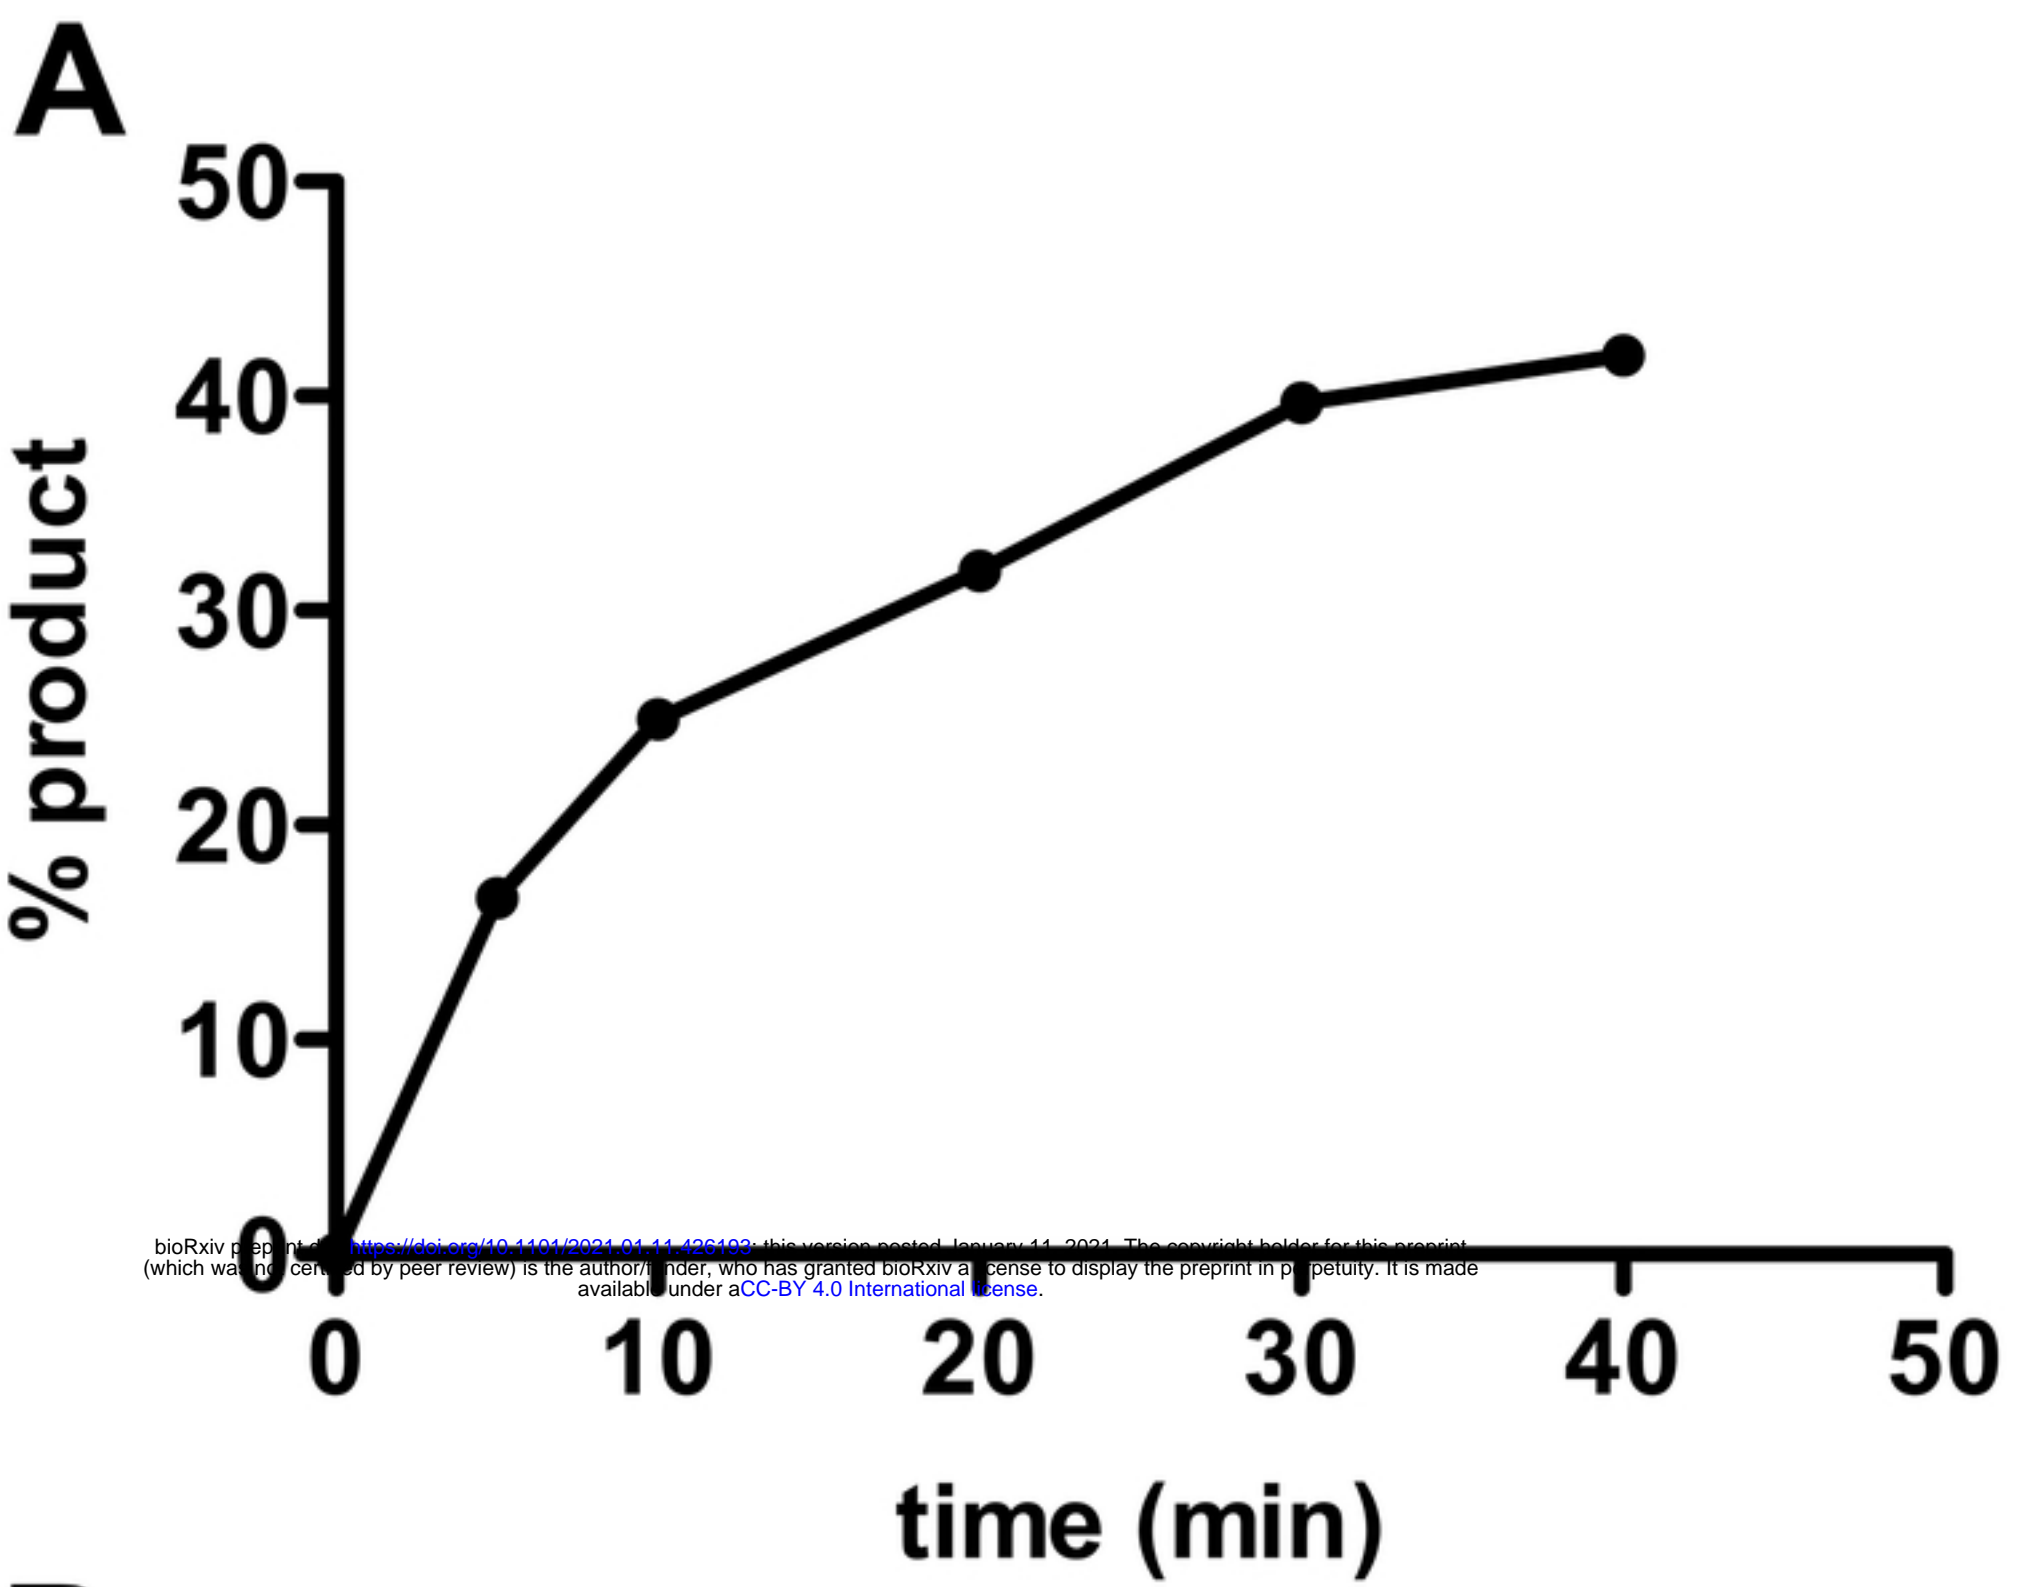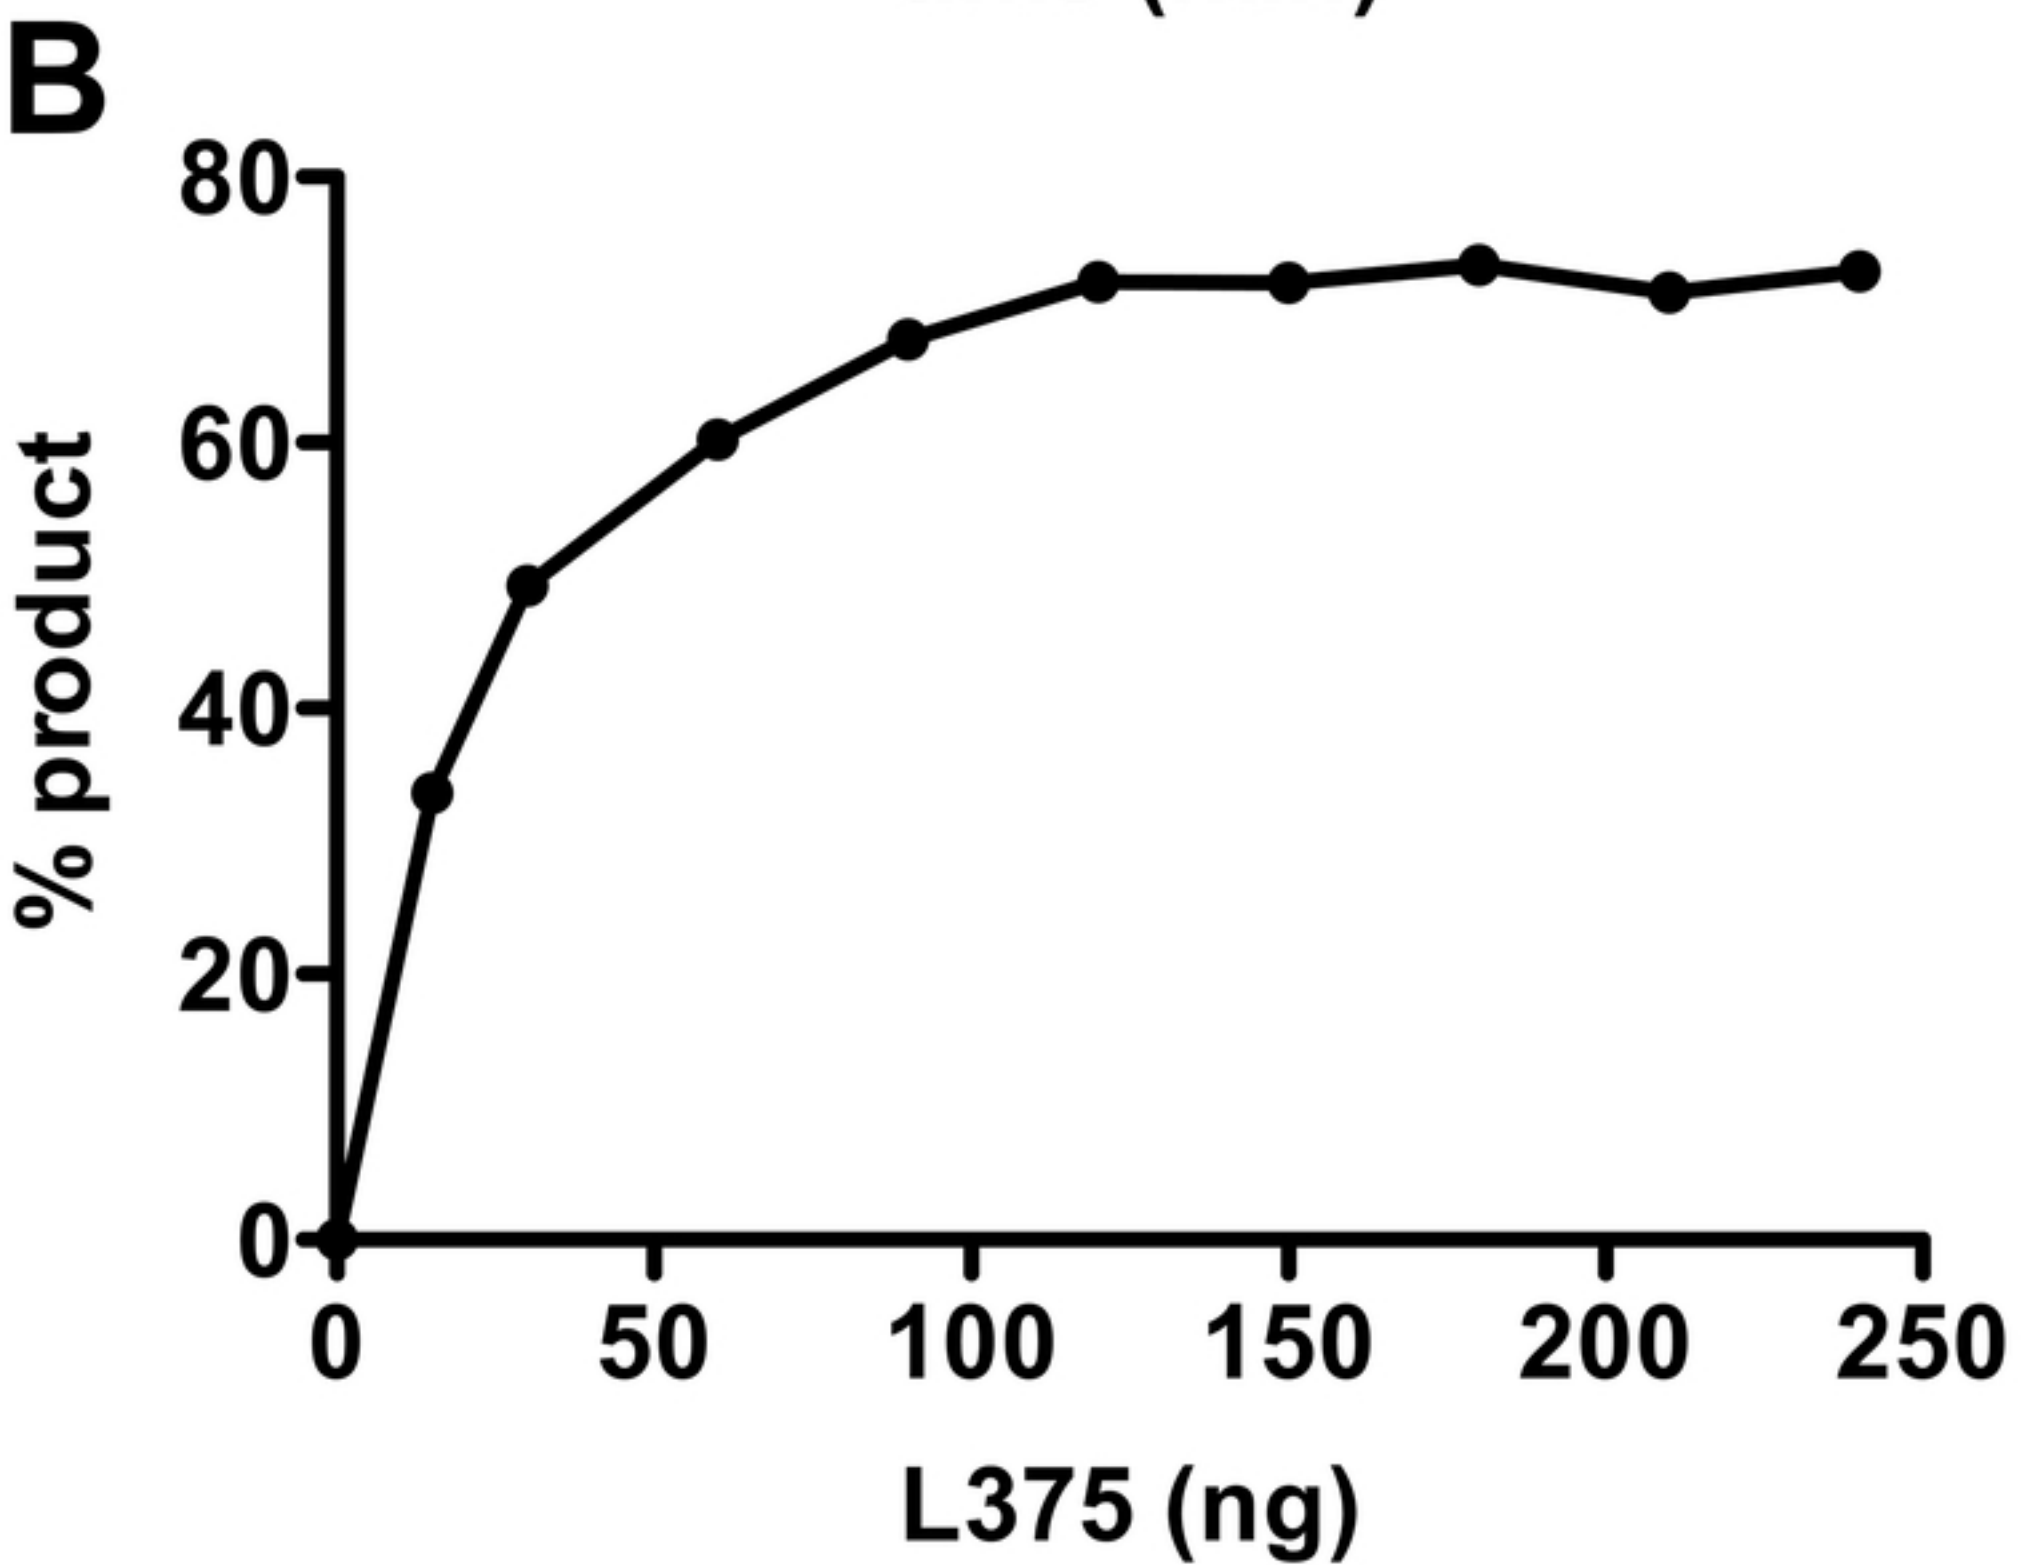

Figure

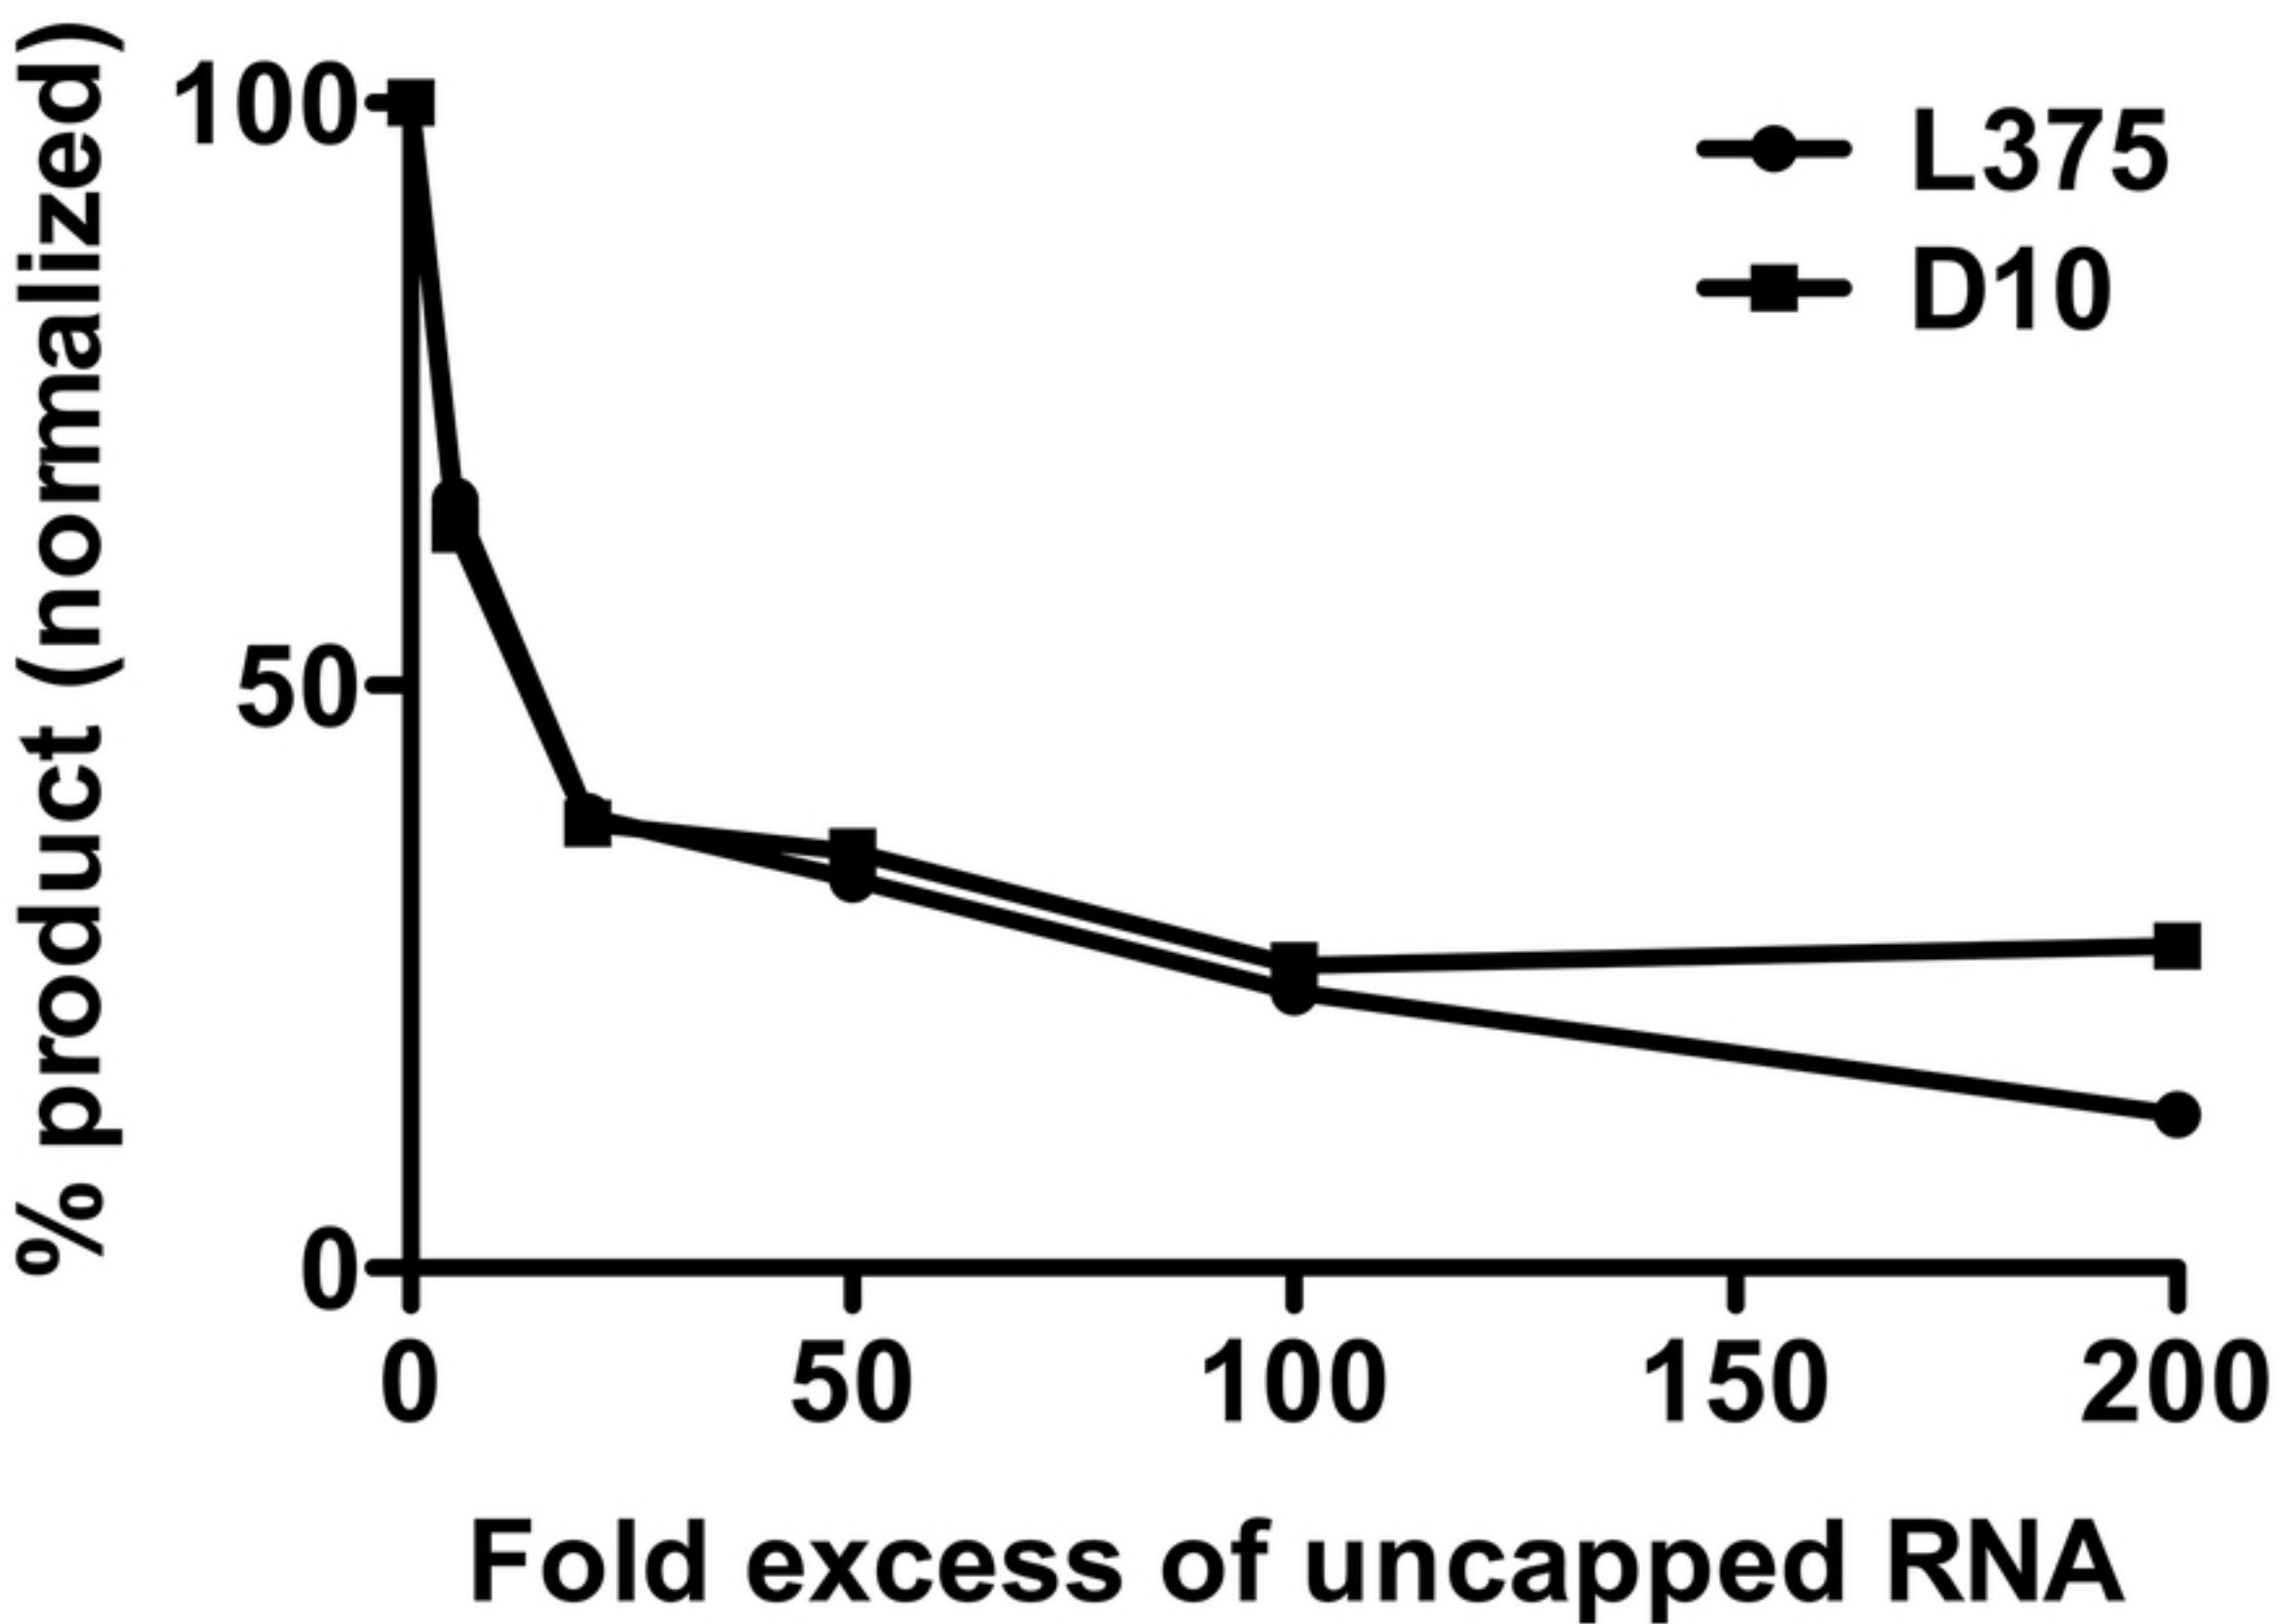

Figure

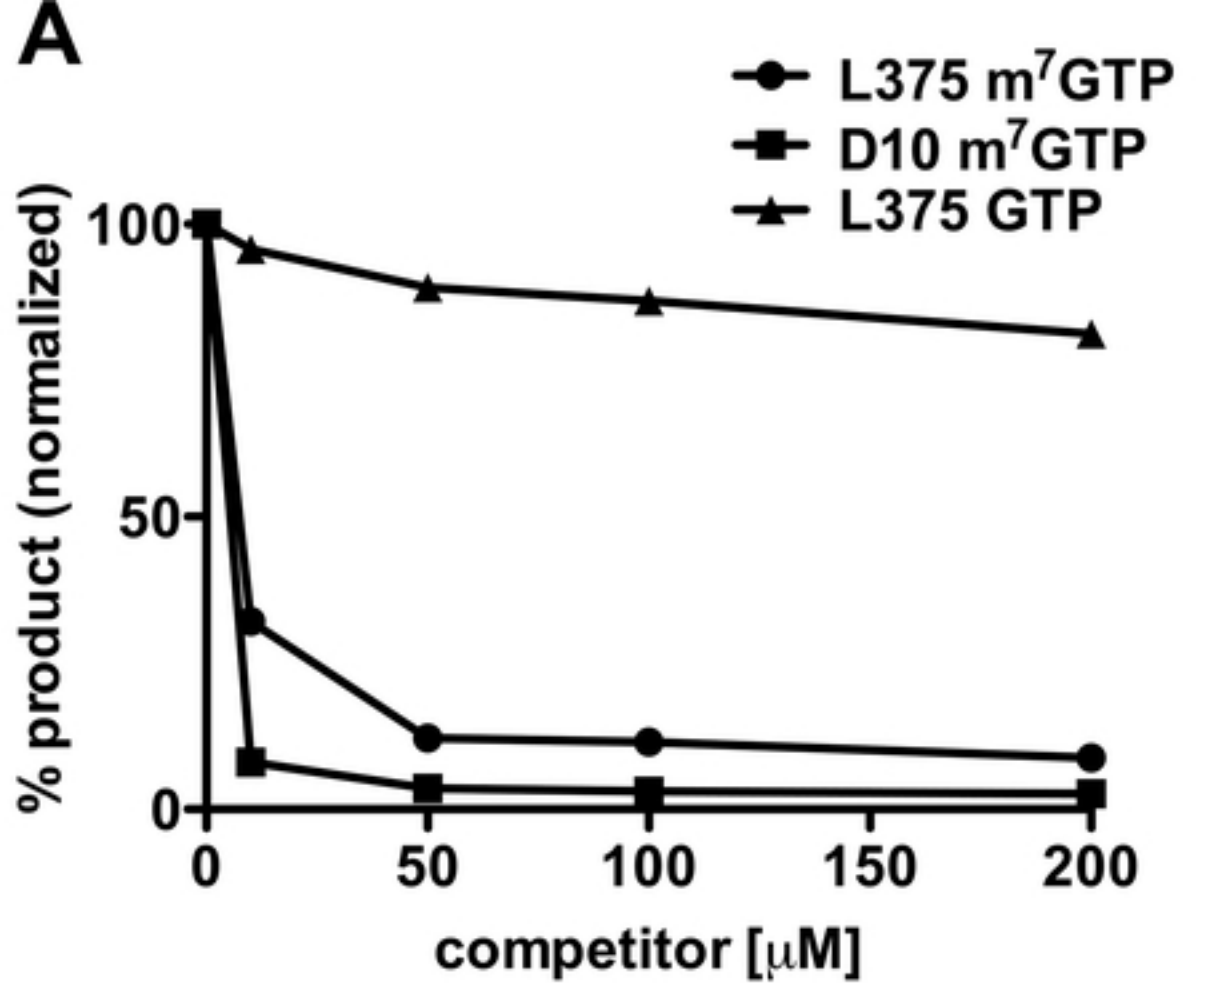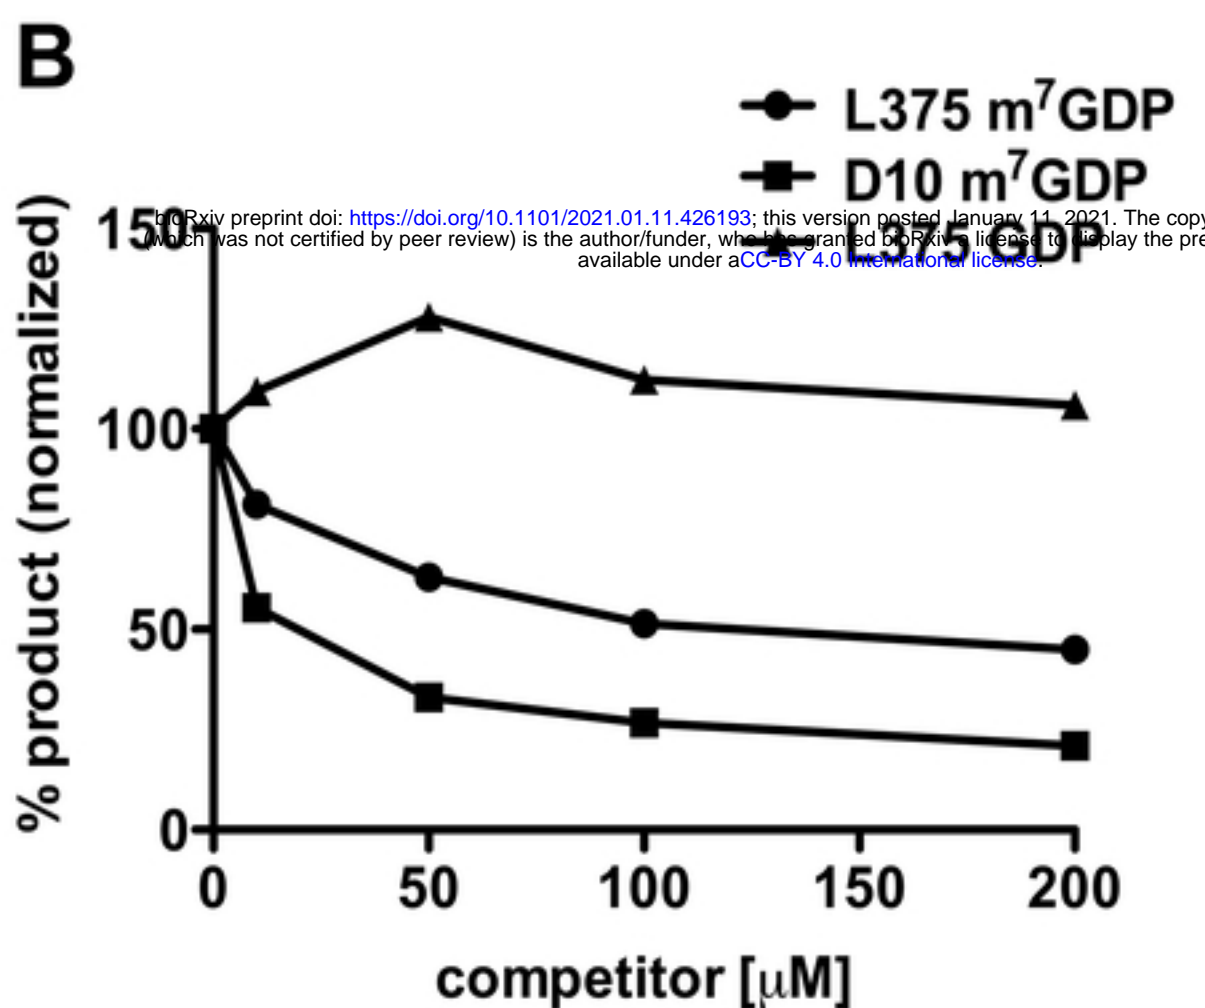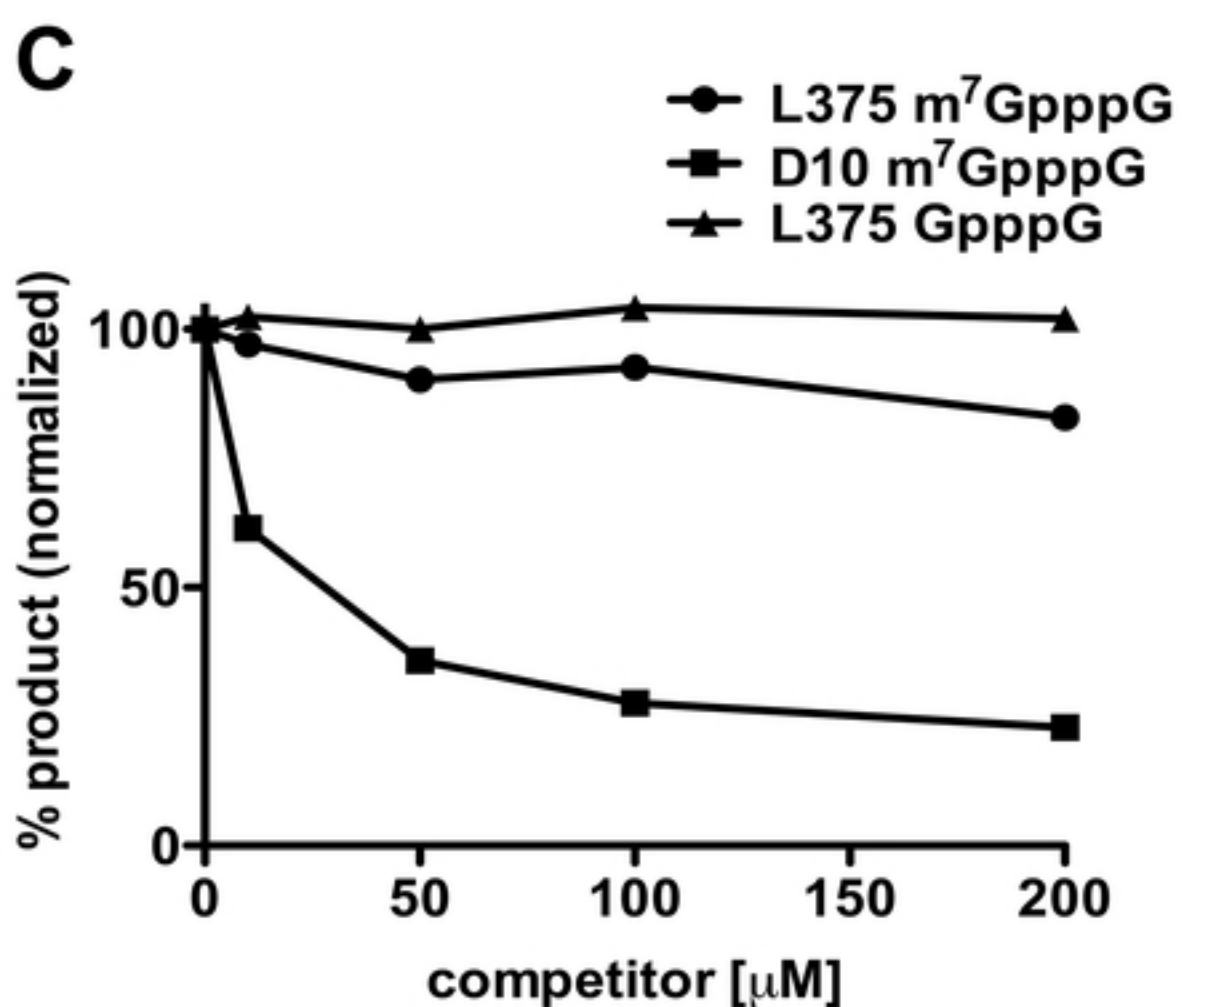

Figure
